# Supplementary material for: Continuous conversion of furfural to furfuryl alcohol by transfer hydrogenation catalyzed by copper deposited in a monolith reactor
Source: Royal Society of Chemistry journal article supplement (doi:10.1039/d2re00363e), 2022-10-25
Supplement: d2re00363e1.pdf [file d2re00363e1.pdf]

## ***Supporting information***

### **Fabrication of a monolith reactor in a copper tube by polymerization of acetylene for flow catalysis**

Tiefu Li,<sup>a</sup> Jiaming Liu,<sup>a</sup> Zipeng Li,<sup>a</sup> Peng Zhang,<sup>a</sup> Yunlong Yao,<sup>a</sup> Zhichao Sun,<sup>a,b</sup> Yao Wang,<sup>a,b,\*</sup> Ying-Ya  
Liu,<sup>a,b</sup> and Anjie Wang,<sup>a,b,\*</sup>

<sup>a</sup> State Key Laboratory of Fine Chemicals, School of Chemical Engineering, Dalian  
University of Technology, Dalian 116024, P. R. China.

<sup>b</sup> Liaoning Key Laboratory of Petrochemical Technology and Equipment, Dalian  
University of Technology, Dalian 116024, P. R. China.

Corresponding authors:

Prof. Yao Wang and Anjie Wang

E-mails: wangyao@dlut.edu.cn; ajwang@dlut.edu.cn

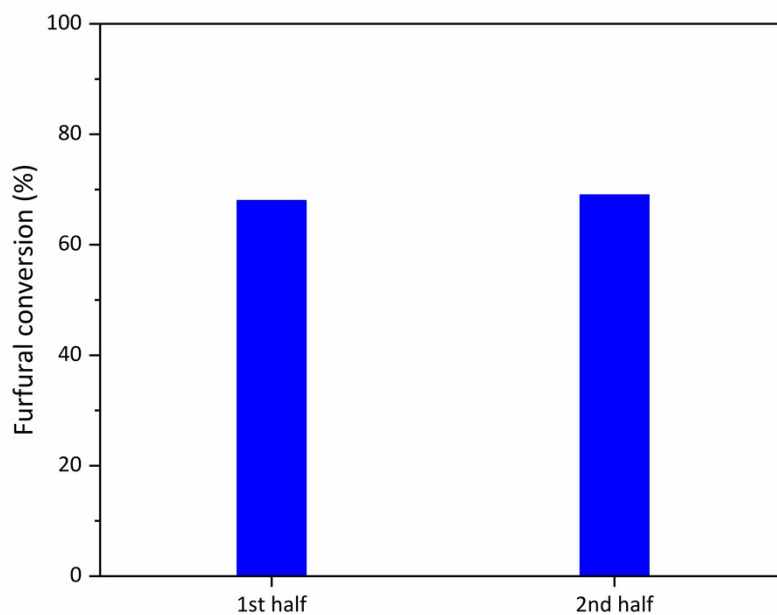

**Fig. S1** Comparison of the catalytic performances of the two half coiled monolith reactors in continuous transfer hydrogenation of furfural (Reaction conditions: 40 mmol/L furfural in isopropanol, 0.03 mL/min, 1.0 MPa).

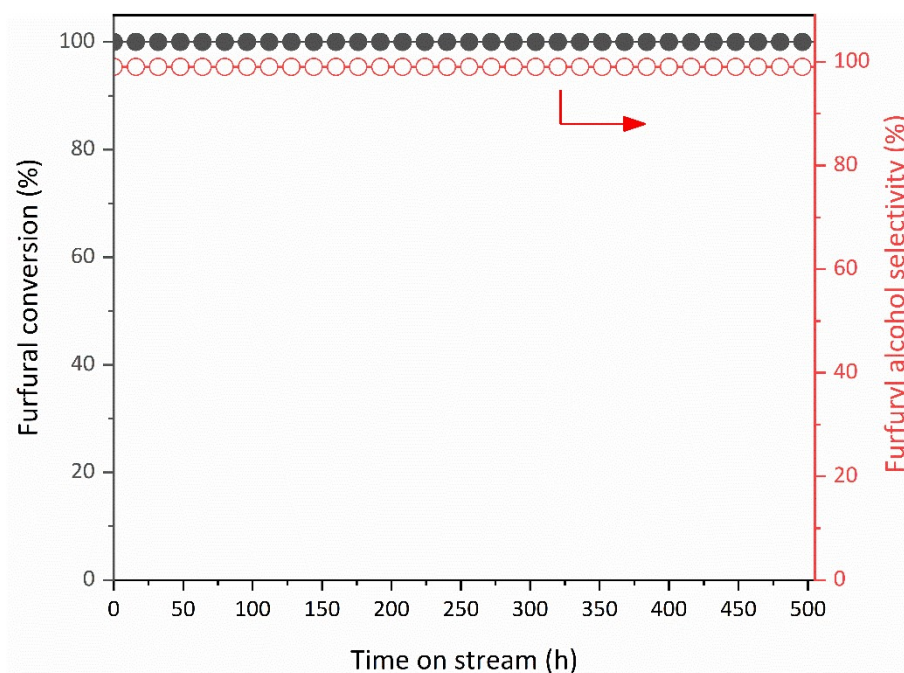

**Fig. S2** Variation of furfural conversion with time on stream in continuous transfer hydrogenation of furfural to produce furfuryl alcohol (Reaction conditions: 40 mmol/L furfural in isopropanol, 0.03 mL/min, 1.0 MPa).
